# Supplementary material
Source: publisher figshare collection journal article supplement (https://diabetesjournals.figshare.com/ndownloader/files/34203872)
Supplement: Supplementary file 1 [file 34203872]

## **Trends in timing of and glycemia at initiation of second-line type 2 diabetes treatment in US adults**

### **Online Supplemental Material**

**Supplemental Table 1.** Medication names included in defining cohort of individuals included in this study.

**Supplemental Table 2.** Distribution of medication classes used for initial diabetes monotherapy from 2005 to 2013.

**Supplemental Table 3.** Rates of missing data for variables included in multivariable models.

**Supplemental Table 4.** Comorbidities at baseline across years of metformin monotherapy initiation.

**Supplemental Table 5.** Comparison of characteristics of individuals with less than versus at least 5 years of follow-up.

**Supplemental Table 6.** Hemoglobin A1c trends at initiation of metformin monotherapy and second medication stratifying at age 50 years, 60 years, and 65 years.

**Supplemental Table 7.** Hemoglobin A1c trends at the end of follow-up among all participants, those receiving second line diabetes treatment within five years, and those remaining on metformin monotherapy.

**Supplemental Table 8.** Impact of additional covariates on temporal trends of second line diabetes medication initiation.

**Supplemental Table 9.** Temporal trends in second line diabetes medication initiation in consecutive annual cohorts of metformin monotherapy initiators from 2005 to 2013, stratified by baseline cancer status.

**Supplemental Table 10.** Hazard ratios for association of metformin initiation year with initiation of a second diabetes medication over 5 years, stratifying at age 50 years, 60 years, and 65 years.

**Supplemental Figure 1.** Analysis of residuals for linear regression examining association of year of metformin monotherapy initiation with HbA1c at second-line medication initiation.

**Supplemental Figure 2.** Plot of Schoenfeld residuals assessing proportional hazards assumption when assessing association of year of metformin monotherapy initiation with time to second-line diabetes treatment initiation.

**Supplemental Figure 3.** Trends in second-line diabetes medication use among patients receiving initial metformin monotherapy for diabetes from 2005-2013.

**Supplemental Figure 4.** Hemoglobin A1c trends at baseline and at initiation of second diabetes medication using narrow baseline definition of occurring between 1 year prior to and 1 month after metformin initiation.

**Supplemental Figure 5.** Trends in time to second-line diabetes treatment initiation among patients initially treated with metformin monotherapy from 2005-2013.

**Supplemental Figure 6.** Trends in time to second-line diabetes treatment initiation among patients initially treated with metformin monotherapy from 2005-2013, stratified by baseline age  $\leq 55$  years (A) or  $> 55$  years (B).

**Supplemental Figure 7.** Trends in HbA1c surveillance frequency among individuals initially treated with metformin monotherapy for diabetes from 2005-2013.

### **STROBE Checklist**

**Supplemental Table 1.** Medication names included in defining cohort of individuals included in this study.

|                          |                                                                                                                                                       |
|--------------------------|-------------------------------------------------------------------------------------------------------------------------------------------------------|
| <b>Metformin</b>         | Metformin, Glucophage, Fortamet, Glumetza, Riomet, Janumet (combination)                                                                              |
| <b>Sulfonylurea</b>      | Acetohexamide, Glyburide, Glibenclamide, Glimepiride, Tolbutamide, Glipizide, Chlorpropamide, Tolazamide, Amaryl, Glucotrol,                          |
| <b>Insulin</b>           | Insulin, Aspart, Humulin, Glargine, Detemir, Lantus, Levemir, Novolog, Novolin, NPH, Regular                                                          |
| <b>Thiazolidinedione</b> | Pioglitazone, Actos, Rosiglitazone, Avandia, Troglitazone                                                                                             |
| <b>DPP-4i</b>            | Alogliptin, Saxagliptin, Sitagliptin, Linagliptin, Januvia, Onglyza, Tradjenta, Nesina, Janumet (combination)                                         |
| <b>GLP1-RA</b>           | Liraglutide, Exenatide, Semaglutide, Lixisenatide, Albiglutide, Dulaglutide, Byetta, Bydureon, Victoza, Saxenda, Adlyxin, Tanzeum, Trulicity, Ozempic |
| <b>SGLT-2i</b>           | Canagliflozin, Dapagliflozin, Empagliflozin, Ertugliflozin, Invokana, Farxiga, Jardiance, Steglatro                                                   |
| <b>Meglitinide</b>       | Repaglinide, Prandin, Nateglinide                                                                                                                     |

**Supplemental Table 2.** Distribution of medication classes used for initial diabetes monotherapy from 2005 to 2013.

| Drug class          |          | Total   | Diabetes monotherapy initiation year |        |        |        |        |        |        |        |        |
|---------------------|----------|---------|--------------------------------------|--------|--------|--------|--------|--------|--------|--------|--------|
|                     |          |         | 2005                                 | 2006   | 2007   | 2008   | 2009   | 2010   | 2011   | 2012   | 2013   |
| <b>Metformin</b>    | <i>N</i> | 206,841 | 18,206                               | 20,997 | 22,957 | 23,306 | 23,542 | 24,138 | 25,366 | 23,931 | 24,398 |
|                     | %        | 70.7%   | 55.1%                                | 59.7%  | 66.1%  | 70.3%  | 73.3%  | 75.9%  | 77.8%  | 79.8%  | 81.8%  |
| <b>Sulfonylurea</b> | <i>N</i> | 66,522  | 12,134                               | 11,539 | 9510   | 7757   | 6575   | 5725   | 5328   | 4275   | 3679   |
|                     | %        | 22.7%   | 36.7%                                | 32.8%  | 27.4%  | 23.4%  | 20.5%  | 18.0%  | 16.3%  | 14.3%  | 12.3%  |
| <b>Insulin</b>      | <i>N</i> | 13,241  | 1245                                 | 1274   | 1320   | 1527   | 1594   | 1590   | 1648   | 1511   | 1532   |
|                     | %        | 4.5%    | 3.8%                                 | 3.6%   | 3.8%   | 4.6%   | 5.0%   | 5.0%   | 5.1%   | 5.0%   | 5.1%   |
| <b>TZD</b>          | <i>N</i> | 4304    | 1399                                 | 1298   | 792    | 309    | 206    | 169    | 79     | 31     | 21     |
|                     | %        | 1.5%    | 4.2%                                 | 3.7%   | 2.3%   | 0.9%   | 0.6%   | 0.5%   | 0.2%   | 0.1%   | 0.1%   |
| <b>DPP-4i</b>       | <i>N</i> | 1093    | 0                                    | 1      | 87     | 157    | 170    | 134    | 167    | 201    | 176    |
|                     | %        | 0.4%    | 0.0%                                 | 0.0%   | 0.3%   | 0.5%   | 0.5%   | 0.4%   | 0.5%   | 0.7%   | 0.6%   |
| <b>Meglitinide</b>  | <i>N</i> | 394     | 71                                   | 80     | 67     | 59     | 36     | 27     | 18     | 25     | 11     |
|                     | %        | 0.1%    | 0.2%                                 | 0.2%   | 0.2%   | 0.2%   | 0.1%   | 0.1%   | 0.1%   | 0.1%   | 0.0%   |
| <b>GLP1-RA</b>      | <i>N</i> | 117     | 0                                    | 11     | 23     | 23     | 11     | 8      | 14     | 10     | 17     |
|                     | %        | 0.0%    | 0.0%                                 | 0.0%   | 0.1%   | 0.1%   | 0.0%   | 0.0%   | 0.0%   | 0.0%   | 0.1%   |
| <b>SGLT-2i</b>      | <i>N</i> | 1       | 0                                    | 0      | 0      | 0      | 0      | 0      | 0      | 0      | 1      |
|                     | %        | 0.0%    | 0.0%                                 | 0.0%   | 0.0%   | 0.0%   | 0.0%   | 0.0%   | 0.0%   | 0.0%   | 0.0%   |

Abbreviations: TZD, Thiazolidinedione; DPP-4i, Dipeptidyl peptidase 4 inhibitor; GLP1-RA, glucagon-like peptide 1 receptor agonist; SGLT-2i, Sodium glucose cotransporter 2 inhibitor

**Supplemental Table 3.** Rates of missing data for variables included in multivariable models.

|                                 | <b>Percent Missing</b> |
|---------------------------------|------------------------|
| <b>Age</b>                      | 0                      |
| <b>Sex</b>                      | 0                      |
| <b>Race</b>                     | 0                      |
| <b>Smoking Status</b>           | 0.1                    |
| <b>BMI</b>                      | 0                      |
| <b>HbA1c</b>                    | 3.7                    |
| <b>eGFR</b>                     | 1.9                    |
| <b>Creatinine</b>               | 1.9                    |
| <b>Comorbidities</b>            |                        |
| <i>Cancer</i>                   | 0                      |
| <i>Coronary Artery Disease</i>  | 0                      |
| <i>Congestive Heart Failure</i> | 0                      |
| <i>Stroke</i>                   | 0                      |
| <i>Kidney Disease</i>           | 0                      |
| <i>Liver Disease</i>            | 0                      |
| <i>COPD</i>                     | 0                      |

**Supplemental Table 4.** Comorbidities at baseline across years of metformin monotherapy initiation.

|                                                       |                  | Metformin start year |                |                |                |                |                |                |                |                | <i>P<sub>het</sub></i> <sup>*</sup> | <i>P<sub>trend</sub></i> <sup>†</sup> |
|-------------------------------------------------------|------------------|----------------------|----------------|----------------|----------------|----------------|----------------|----------------|----------------|----------------|-------------------------------------|---------------------------------------|
|                                                       | Total            | 2005                 | 2006           | 2007           | 2008           | 2009           | 2010           | 2011           | 2012           | 2013           |                                     |                                       |
| <b>Cancer, No. (%)</b>                                | 68,925<br>(34.6) | 4927<br>(28.2)       | 6201<br>(30.6) | 7146<br>(32.4) | 7672<br>(34.2) | 8093<br>(35.8) | 8461<br>(36.5) | 8986<br>(36.7) | 8578<br>(37.2) | 8861<br>(37.7) | <0.0001                             | <0.0001                               |
| <b>Coronary Artery Disease, No. (%)</b>               | 56,216<br>(28.2) | 5404<br>(31.0)       | 6126<br>(30.3) | 6672<br>(30.2) | 6788<br>(30.3) | 6410<br>(28.4) | 6353<br>(27.4) | 6563<br>(26.8) | 6040<br>(26.2) | 5860<br>(24.9) | <0.0001                             | 1                                     |
| <b>Congestive Heart Failure, No. (%)</b>              | 11,052<br>(5.6)  | 1011<br>(5.8)        | 1128<br>(5.6)  | 1221<br>(5.5)  | 1309<br>(5.8)  | 1246<br>(5.5)  | 1205<br>(5.2)  | 1352<br>(5.5)  | 1351<br>(5.9)  | 1229<br>(5.2)  | 0.1                                 | 1                                     |
| <b>Stroke, No. (%)</b>                                | 16,076<br>(8.1)  | 1304<br>(7.5)        | 1554<br>(7.7)  | 1809<br>(8.2)  | 1863<br>(8.3)  | 1850<br>(8.2)  | 1881<br>(8.1)  | 1992<br>(8.1)  | 1935<br>(8.4)  | 1888<br>(8.0)  | 0.01                                | 0.006                                 |
| <b>Kidney Disease, No. (%)</b>                        | 511<br>(0.3)     | 15<br>(0.1)          | 50<br>(0.2)    | 69<br>(0.3)    | 72<br>(0.3)    | 74<br>(0.3)    | 77<br>(0.3)    | 48<br>(0.2)    | 55<br>(0.2)    | 51<br>(0.2)    | 0.7                                 | 0.3                                   |
| <b>Liver Disease, No. (%)</b>                         | 4152<br>(2.1)    | 202<br>(1.2)         | 311<br>(1.5)   | 375<br>(1.7)   | 430<br>(1.9)   | 471<br>(2.1)   | 523<br>(2.3)   | 561<br>(2.3)   | 609<br>(2.6)   | 670<br>(2.8)   | <0.0001                             | <0.0001                               |
| <b>Chronic Obstructive Pulmonary Disease, No. (%)</b> | 41,688<br>(20.9) | 3483<br>(20.0)       | 4144<br>(20.5) | 4533<br>(20.5) | 4813<br>(21.5) | 4783<br>(21.2) | 4885<br>(21.1) | 5234<br>(21.4) | 4846<br>(21.0) | 4967<br>(21.1) | 0.001                               | 0.0006                                |

<sup>\*</sup> Cochran Armitage Test for directional trend for increasing or decreasing prevalence across years of metformin initiation

<sup>†</sup> Cochran Armitage Test for directional trend for increasing prevalence across metformin initiation years

**Supplemental Table 5.** Comparison of characteristics of individuals with less than versus at least 5 years of follow-up.

|                                                      | <5 years of follow-up   | ≥5 years of follow-up   |
|------------------------------------------------------|-------------------------|-------------------------|
|                                                      | N=50,169                | N=148,873               |
| <b>Age (years), median [IQR]</b>                     | 65.96 [58.77, 75.54]    | 61.77 [55.66, 67.16]    |
| <b>Male sex, No. (%)</b>                             | 48536 (96.7)            | 142173 (95.5)           |
| <b>Race, No. (%)</b>                                 |                         |                         |
| BLACK                                                | 6294 (12.5)             | 24641 (16.6)            |
| HISPANIC                                             | 2310 (4.6)              | 9175 (6.2)              |
| OTHER                                                | 7356 (14.7)             | 11467 (7.7)             |
| WHITE                                                | 34209 (68.2)            | 103590 (69.6)           |
| <b>Smoking status, No. (%)</b>                       |                         |                         |
| MISSING                                              | 31 (0.1)                | 85 (0.1)                |
| CURRENT                                              | 14861 (29.6)            | 43119 (29.0)            |
| FORMER                                               | 24447 (48.7)            | 70170 (47.1)            |
| NEVER                                                | 10830 (21.6)            | 35499 (23.8)            |
| <b>BMI (kg/m<sup>2</sup>), median [IQR]</b>          | 31.47 [27.83, 35.74]    | 32.81 [29.34, 37.02]    |
| <b>SBP (mmHg), median [IQR]</b>                      | 132.00 [122.00, 141.00] | 132.00 [122.00, 140.00] |
| <b>DBP, (mmHg) median [IQR]</b>                      | 76.00 [68.00, 83.00]    | 78.00 [70.00, 84.00]    |
| <b>HDL (mg/dL), median [IQR]</b>                     | 38.00 [32.00, 45.40]    | 38.00 [32.00, 44.00]    |
| <b>LDL (mg/dL), median [IQR]</b>                     | 95.00 [75.00, 120.00]   | 98.00 [78.20, 122.90]   |
| <b>TC (mg/dL), median [IQR]</b>                      | 169.00 [145.00, 199.00] | 173.00 [149.00, 202.00] |
| <b>TG (mg/dL), median [IQR]</b>                      | 154.00 [107.00, 228.00] | 165.00 [114.00, 243.00] |
| <b>FPG (mg/dL), median [IQR]</b>                     | 136.00 [116.00, 166.00] | 137.00 [119.00, 166.00] |
| <b>HbA1c (%), median [IQR]</b>                       | 6.90 [6.40, 7.60]       | 7.00 [6.50, 7.70]       |
| <b>eGFR (mL/min/1.73m<sup>2</sup>), median [IQR]</b> | 75.40 [64.60, 88.72]    | 77.53 [67.58, 90.50]    |
| <b>Serum creatinine (mg/dL), median [IQR]</b>        | 1.00 [0.90, 1.14]       | 1.00 [0.90, 1.10]       |
| <b>Cancer, No. (%)</b>                               | 17,103 (34.1)           | 51,822 (34.8)           |
| <b>Coronary Artery Disease, No. (%)</b>              | 16,856 (33.6)           | 39,360 (26.4)           |
| <b>Congestive Heart Failure, No. (%)</b>             | 4456 (8.9)              | 6596 (4.4)              |
| <b>Stroke, No. (%)</b>                               | 5282 (10.5)             | 10,794 (7.3)            |
| <b>Kidney Disease, No. (%)</b>                       | 183 (0.4)               | 328 (0.2)               |
| <b>Liver Disease, No. (%)</b>                        | 958 (1.9)               | 3194 (2.1)              |
| <b>COPD, No. (%)</b>                                 | 12,573 (25.1)           | 29,115 (19.6)           |
| <b>Follow-up time (weeks), median [IQR]</b>          | 157.29 [68.71, 225.29]  | 275.14 [267.43, 285.57] |

**Abbreviations:** BMI, body mass index; SBP, systolic blood pressure; DBP, diastolic blood pressure; HDL, high density lipoprotein cholesterol; LDL, low density lipoprotein cholesterol; TC, total cholesterol; TG, triglycerides; FPG, fasting plasma glucose; HbA1c, hemoglobin A1c; eGFR, estimated glomerular filtration rate.

**Supplemental Table 6.** Hemoglobin A1c trends at initiation of metformin monotherapy and second medication stratifying at age 50 years, 60 years, and 65 years.

| Age strata | HbA1c timepoint                   | Metformin monotherapy initiation year |             |             |             |             |             |             |             |             | Trend <i>P</i> * |
|------------|-----------------------------------|---------------------------------------|-------------|-------------|-------------|-------------|-------------|-------------|-------------|-------------|------------------|
|            |                                   | 2005                                  | 2006        | 2007        | 2008        | 2009        | 2010        | 2011        | 2012        | 2013        |                  |
| ≤50 years  | Metformin start, % (SD)           | 7.61 (1.77)                           | 7.67 (1.75) | 7.66 (1.76) | 7.61 (1.70) | 7.60 (1.60) | 7.66 (1.72) | 7.71 (1.69) | 7.73 (1.67) | 7.69 (1.58) | 0.89             |
|            | 2 <sup>nd</sup> Med start, % (SD) | 8.56 (2.03)                           | 8.55 (1.89) | 8.55 (1.92) | 8.70 (1.99) | 8.74 (1.90) | 8.96 (1.94) | 9.12 (2.00) | 9.15 (2.05) | 9.19 (2.03) | <0.0001          |
| >50 years  | Metformin start, % (SD)           | 7.21 (1.42)                           | 7.20 (1.35) | 7.15 (1.33) | 7.14 (1.31) | 7.18 (1.31) | 7.22 (1.29) | 7.29 (1.29) | 7.31 (1.31) | 7.32 (1.28) | <0.0001          |
|            | 2 <sup>nd</sup> Med start, % (SD) | 7.61 (1.55)                           | 7.66 (1.59) | 7.71 (1.61) | 7.80 (1.65) | 7.99 (1.72) | 8.13 (1.77) | 8.21 (1.81) | 8.29 (1.84) | 8.40 (1.86) | <0.0001          |
| ≤60 years  | Metformin start, % (SD)           | 7.45 (1.66)                           | 7.44 (1.59) | 7.43 (1.62) | 7.42 (1.58) | 7.47 (1.53) | 7.52 (1.57) | 7.58 (1.57) | 7.57 (1.54) | 7.57 (1.50) | 0.0006           |
|            | 2 <sup>nd</sup> Med start, % (SD) | 8.12 (1.81)                           | 8.16 (1.79) | 8.19 (1.79) | 8.36 (1.90) | 8.53 (1.88) | 8.72 (1.94) | 8.83 (1.98) | 8.90 (2.01) | 8.98 (1.99) | <0.0001          |
| >60 years  | Metformin start, % (SD)           | 7.10 (1.25)                           | 7.10 (1.23) | 7.04 (1.18) | 7.04 (1.19) | 7.09 (1.20) | 7.14 (1.20) | 7.21 (1.20) | 7.25 (1.25) | 7.25 (1.20) | <0.0001          |
|            | 2 <sup>nd</sup> Med start, % (SD) | 7.33 (1.36)                           | 7.40 (1.41) | 7.47 (1.48) | 7.56 (1.48) | 7.75 (1.59) | 7.89 (1.63) | 7.99 (1.70) | 8.07 (1.73) | 8.17 (1.77) | <0.0001          |
| ≤65 years  | Metformin start, % (SD)           | 7.41 (1.62)                           | 7.39 (1.54) | 7.35 (1.53) | 7.31 (1.49) | 7.35 (1.45) | 7.40 (1.47) | 7.46 (1.46) | 7.47 (1.46) | 7.49 (1.43) | <0.0001          |
|            | 2 <sup>nd</sup> Med start, % (SD) | 8.02 (1.77)                           | 8.04 (1.75) | 8.06 (1.75) | 8.18 (1.82) | 8.34 (1.83) | 8.49 (1.88) | 8.58 (1.92) | 8.70 (1.95) | 8.80 (1.96) | <0.0001          |
| >65 years  | Metformin start, % (SD)           | 7.02 (1.15)                           | 7.03 (1.13) | 6.96 (1.07) | 6.97 (1.09) | 7.02 (1.12) | 7.05 (1.07) | 7.14 (1.12) | 7.19 (1.18) | 7.20 (1.15) | <0.0001          |
|            | 2 <sup>nd</sup> Med start, % (SD) | 7.17 (1.22)                           | 7.22 (1.27) | 7.24 (1.33) | 7.33 (1.33) | 7.46 (1.43) | 7.62 (1.49) | 7.79 (1.61) | 7.85 (1.65) | 8.02 (1.71) | <0.0001          |

\* Adjusted models included sex, race, and baseline age, HbA1c, creatinine, and BMI.

**Supplemental Table 7.** Hemoglobin A1c trends at the end of follow-up among all participants, those receiving second line diabetes treatment within five years, and those remaining on metformin monotherapy.

|                                          | Metformin start year |               |               |               |               |               |               |               |               | Trend    |
|------------------------------------------|----------------------|---------------|---------------|---------------|---------------|---------------|---------------|---------------|---------------|----------|
|                                          | 2005                 | 2006          | 2007          | 2008          | 2009          | 2010          | 2011          | 2012          | 2013          | P-value* |
| <b>All participants</b>                  |                      |               |               |               |               |               |               |               |               |          |
| Mean HbA1c, % (SD)                       | 6.94 (1.28)          | 6.97 (1.31)   | 6.97 (1.33)   | 7.00 (1.35)   | 7.03 (1.39)   | 7.02 (1.39)   | 7.03 (1.41)   | 7.05 (1.42)   | 7.09 (1.42)   | <0.0001  |
| HbA1c < 7, No. (%)                       | 10,768 (61.9)        | 12,422 (61.6) | 13,667 (62.0) | 13,591 (60.7) | 13,590 (60.3) | 14,019 (60.5) | 14,847 (60.7) | 13,810 (59.9) | 13,788 (58.6) |          |
| 7 ≤ HbA1c < 8, No. (%)                   | 3,800 (21.9)         | 4,358 (21.6)  | 4,695 (21.3)  | 4,959 (22.1)  | 4,839 (21.5)  | 5,073 (21.9)  | 5,235 (21.4)  | 4,969 (21.5)  | 5,242 (22.3)  |          |
| 8 ≤ HbA1c < 9, No. (%)                   | 1,297 (7.5)          | 1,540 (7.6)   | 1,676 (7.6)   | 1,807 (8.1)   | 1,910 (8.5)   | 1,868 (8.1)   | 1,998 (8.2)   | 1,984 (8.6)   | 2,095 (8.9)   |          |
| HbA1c ≥ 9, No. (%)                       | 1,206 (6.9)          | 1,536 (7.6)   | 1,681 (7.6)   | 1,772 (7.9)   | 1,960 (8.7)   | 1,992 (8.6)   | 2,206 (9.0)   | 2,121 (9.2)   | 2,204 (9.4)   |          |
| <b>Received 2<sup>nd</sup> line drug</b> |                      |               |               |               |               |               |               |               |               |          |
| Mean HbA1c, % (SD)                       | 7.25 (1.39)          | 7.34 (1.45)   | 7.37 (1.48)   | 7.46 (1.52)   | 7.54 (1.57)   | 7.57 (1.58)   | 7.65 (1.63)   | 7.72 (1.66)   | 7.80 (1.68)   | <0.0001  |
| HbA1c < 7, No. (%)                       | 5,728 (51.2)         | 6,029 (48.6)  | 6,199 (47.8)  | 5,547 (44.3)  | 5,248 (42.7)  | 5,015 (41.5)  | 4,689 (39.4)  | 3,922 (37.4)  | 3,572 (35.5)  |          |
| 7 ≤ HbA1c < 8, No. (%)                   | 3,115 (27.9)         | 3,480 (28.0)  | 3,626 (27.9)  | 3,655 (29.2)  | 3,506 (28.5)  | 3,550 (29.4)  | 3,473 (29.2)  | 3,048 (29.0)  | 2,914 (28.9)  |          |
| 8 ≤ HbA1c < 9, No. (%)                   | 1,191 (10.7)         | 1,430 (11.5)  | 1,556 (12.0)  | 1,647 (13.1)  | 1,702 (13.8)  | 1,637 (13.5)  | 1,705 (14.3)  | 1,602 (15.3)  | 1,613 (16.0)  |          |
| HbA1c ≥ 9, No. (%)                       | 1,146 (10.3)         | 1,471 (11.9)  | 1,597 (12.3)  | 1,682 (13.4)  | 1,843 (15.0)  | 1,893 (15.7)  | 2,039 (17.1)  | 1,924 (18.3)  | 1,978 (19.6)  |          |
| <b>No 2<sup>nd</sup> line drug</b>       |                      |               |               |               |               |               |               |               |               |          |
| Mean HbA1c, % (SD)                       | 6.37 (0.76)          | 6.36 (0.71)   | 6.36 (0.73)   | 6.40 (0.75)   | 6.40 (0.77)   | 6.40 (0.78)   | 6.44 (0.81)   | 6.49 (0.84)   | 6.55 (0.87)   | <0.0001  |
| HbA1c < 7, No. (%)                       | 5,675 (85.6)         | 7,228 (85.9)  | 8,468 (85.4)  | 9,193 (83.8)  | 9,717 (83.4)  | 10,598 (82.9) | 12,057 (82.1) | 11,764 (79.8) | 12,314 (77.1) |          |
| 7 ≤ HbA1c < 8, No. (%)                   | 793 (11.6)           | 1,052 (11.8)  | 1,254 (12.2)  | 1,518 (13.6)  | 1,603 (13.3)  | 1,824 (14.0)  | 2,125 (14.2)  | 2,337 (15.5)  | 2,848 (17.6)  |          |
| 8 ≤ HbA1c < 9, No. (%)                   | 130 (1.8)            | 160 (1.5)     | 146 (1.4)     | 192 (1.7)     | 270 (2.1)     | 278 (2.1)     | 355 (2.4)     | 449 (3.1)     | 588 (3.6)     |          |
| HbA1c ≥ 9, No. (%)                       | 74 (1.0)             | 82 (0.9)      | 104 (1.0)     | 124 (0.9)     | 136 (1.2)     | 143 (0.9)     | 228 (1.4)     | 248 (1.6)     | 299 (1.7)     |          |

\* Adjusted models included sex, race, and baseline age, HbA1c, creatinine, and BMI.

**Supplemental Table 8.** Impact of additional covariates on temporal trends of second line diabetes medication initiation.

|          |                       | Metformin monotherapy initiation year |                      |                      |                      |                      |                      |                      |                      |                      |
|----------|-----------------------|---------------------------------------|----------------------|----------------------|----------------------|----------------------|----------------------|----------------------|----------------------|----------------------|
|          |                       | 2005                                  | 2006                 | 2007                 | 2008                 | 2009                 | 2010                 | 2011                 | 2012                 | 2013                 |
| Model 1* | Hazard Ratio (95% CI) | REF                                   | 0.90<br>(0.87, 0.92) | 0.87<br>(0.84, 0.90) | 0.82<br>(0.80, 0.85) | 0.81<br>(0.78, 0.83) | 0.75<br>(0.73, 0.77) | 0.70<br>(0.68, 0.72) | 0.67<br>(0.65, 0.69) | 0.68<br>(0.66, 0.70) |
|          | P value               | -                                     | <0.0001              | <0.0001              | <0.0001              | <0.0001              | <0.0001              | <0.0001              | <0.0001              | <0.0001              |
| Model 2† | Hazard Ratio (95% CI) | REF                                   | 0.89<br>(0.87, 0.92) | 0.87<br>(0.84, 0.90) | 0.82<br>(0.79, 0.84) | 0.81<br>(0.78, 0.83) | 0.75<br>(0.73, 0.77) | 0.70<br>(0.68, 0.72) | 0.67<br>(0.65, 0.69) | 0.68<br>(0.66, 0.70) |
|          | P value               | -                                     | <0.0001              | <0.0001              | <0.0001              | <0.0001              | <0.0001              | <0.0001              | <0.0001              | <0.0001              |

\* Model1: age, sex, race, HbA1c, creatinine, BMI, and smoking status

† Model 2: Model 1, plus history of coronary artery disease, stroke, congestive heart failure, kidney disease, liver disease, chronic obstructive pulmonary disease, cancer

**Supplemental Table 9.** Temporal trends in second line diabetes medication initiation in consecutive annual cohorts of metformin monotherapy initiators from 2005 to 2013, stratified by baseline cancer status.

|                |                        | Metformin monotherapy initiation year |                      |                      |                      |                      |                      |                      |                      |                      | P <sub>interaction</sub> |
|----------------|------------------------|---------------------------------------|----------------------|----------------------|----------------------|----------------------|----------------------|----------------------|----------------------|----------------------|--------------------------|
|                |                        | 2005                                  | 2006                 | 2007                 | 2008                 | 2009                 | 2010                 | 2011                 | 2012                 | 2013                 |                          |
| Without cancer | Hazard Ratio* (95% CI) | REF                                   | 0.89<br>(0.86, 0.92) | 0.85<br>(0.82, 0.88) | 0.82<br>(0.79, 0.85) | 0.80<br>(0.77, 0.83) | 0.74<br>(0.72, 0.77) | 0.69<br>(0.66, 0.71) | 0.66<br>(0.64, 0.69) | 0.67<br>(0.65, 0.70) | 0.5                      |
|                | P value                | -                                     | <0.0001              | <0.0001              | <0.0001              | <0.0001              | <0.0001              | <0.0001              | <0.0001              | <0.0001              |                          |
| With cancer    | Hazard Ratio* (95% CI) | REF                                   | 0.92<br>(0.87, 0.97) | 0.92<br>(0.87, 0.90) | 0.84<br>(0.79, 0.89) | 0.85<br>(0.80, 0.90) | 0.77<br>(0.73, 0.82) | 0.73<br>(0.69, 0.77) | 0.70<br>(0.66, 0.74) | 0.70<br>(0.66, 0.74) | 0.5                      |
|                | P value                | -                                     | <0.0001              | <0.0001              | <0.0001              | <0.0001              | <0.0001              | <0.0001              | <0.0001              | <0.0001              |                          |

\* Multivariable Cox proportional hazards model adjusted for age, sex, and baseline race, HbA1c, creatinine, and BMI



**Supplemental Table 10.** Hazard ratios for association of metformin initiation year with initiation of a second diabetes medication over 5 years, stratifying at age 50 years, 60 years, and 65 years.

| Age strata |                                             | Metformin monotherapy initiation year |                                 |                                 |                                 |                                 |                                 |                                 |                                 |                                 | <i>P</i> <sub>interaction</sub> |
|------------|---------------------------------------------|---------------------------------------|---------------------------------|---------------------------------|---------------------------------|---------------------------------|---------------------------------|---------------------------------|---------------------------------|---------------------------------|---------------------------------|
|            |                                             | 2005                                  | 2006                            | 2007                            | 2008                            | 2009                            | 2010                            | 2011                            | 2012                            | 2013                            |                                 |
| ≤50 years  | Hazard Ratio*<br>(95% CI)<br><i>P</i> value | REF<br>-                              | 0.94<br>(0.87, 1.02)<br>0.16    | 0.91<br>(0.83, 0.99)<br>0.02    | 0.91<br>(0.84, 0.98)<br>0.02    | 0.94<br>(0.87, 1.02)<br>0.12    | 0.80<br>(0.74, 0.87)<br><0.0001 | 0.79<br>(0.73, 0.86)<br><0.0001 | 0.79<br>(0.73, 0.86)<br><0.0001 | 0.82<br>(0.75, 0.88)<br><0.0001 | <0.0001                         |
| >50 years  | Hazard Ratio*<br>(95% CI)<br><i>P</i> value | REF<br>-                              | 0.89<br>(0.86, 0.92)<br><0.0001 | 0.87<br>(0.84, 0.90)<br><0.0001 | 0.81<br>(0.79, 0.84)<br><0.0001 | 0.79<br>(0.77, 0.82)<br><0.0001 | 0.75<br>(0.72, 0.77)<br><0.0001 | 0.69<br>(0.67, 0.71)<br><0.0001 | 0.65<br>(0.63, 0.68)<br><0.0001 | 0.66<br>(0.64, 0.68)<br><0.0001 |                                 |
| ≤60 years  | Hazard Ratio*<br>(95% CI)<br><i>P</i> value | REF<br>-                              | 0.90<br>(0.86, 0.94)<br><0.0001 | 0.89<br>(0.86, 0.93)<br><0.0001 | 0.86<br>(0.82, 0.90)<br><0.0001 | 0.86<br>(0.82, 0.89)<br><0.0001 | 0.81<br>(0.78, 0.85)<br><0.0001 | 0.75<br>(0.72, 0.78)<br><0.0001 | 0.73<br>(0.70, 0.77)<br><0.0001 | 0.75<br>(0.71, 0.78)<br><0.0001 | <0.0001                         |
| >60 years  | Hazard Ratio*<br>(95% CI)<br><i>P</i> value | REF<br>-                              | 0.89<br>(0.85, 0.93)<br><0.0001 | 0.85<br>(0.82, 0.89)<br><0.0001 | 0.79<br>(0.76, 0.83)<br><0.0001 | 0.78<br>(0.74, 0.81)<br><0.0001 | 0.71<br>(0.68, 0.74)<br><0.0001 | 0.66<br>(0.64, 0.69)<br><0.0001 | 0.63<br>(0.60, 0.66)<br><0.0001 | 0.63<br>(0.60, 0.66)<br><0.0001 |                                 |
| ≤65 years  | Hazard Ratio*<br>(95% CI)<br><i>P</i> value | REF<br>-                              | 0.91<br>(0.87, 0.94)<br><0.0001 | 0.90<br>(0.87, 0.93)<br><0.0001 | 0.85<br>(0.82, 0.89)<br><0.0001 | 0.86<br>(0.83, 0.89)<br><0.0001 | 0.80<br>(0.77, 0.82)<br><0.0001 | 0.73<br>(0.71, 0.76)<br><0.0001 | 0.71<br>(0.69, 0.74)<br><0.0001 | 0.73<br>(0.70, 0.76)<br><0.0001 | <0.0001                         |
| >65 years  | Hazard Ratio*<br>(95% CI)<br><i>P</i> value | REF<br>-                              | 0.87<br>(0.83, 0.92)<br><0.0001 | 0.81<br>(0.76, 0.85)<br><0.0001 | 0.76<br>(0.72, 0.81)<br><0.0001 | 0.71<br>(0.67, 0.75)<br><0.0001 | 0.65<br>(0.61, 0.69)<br><0.0001 | 0.63<br>(0.60, 0.67)<br><0.0001 | 0.59<br>(0.56, 0.62)<br><0.0001 | 0.59<br>(0.56, 0.63)<br><0.0001 |                                 |

\* Adjusted models included sex, race, and baseline age, HbA1c, creatinine, and BMI.

**Supplemental Figure 1.** Analysis of residuals for linear regression examining association of year of metformin monotherapy initiation with HbA1c at second-line medication initiation.

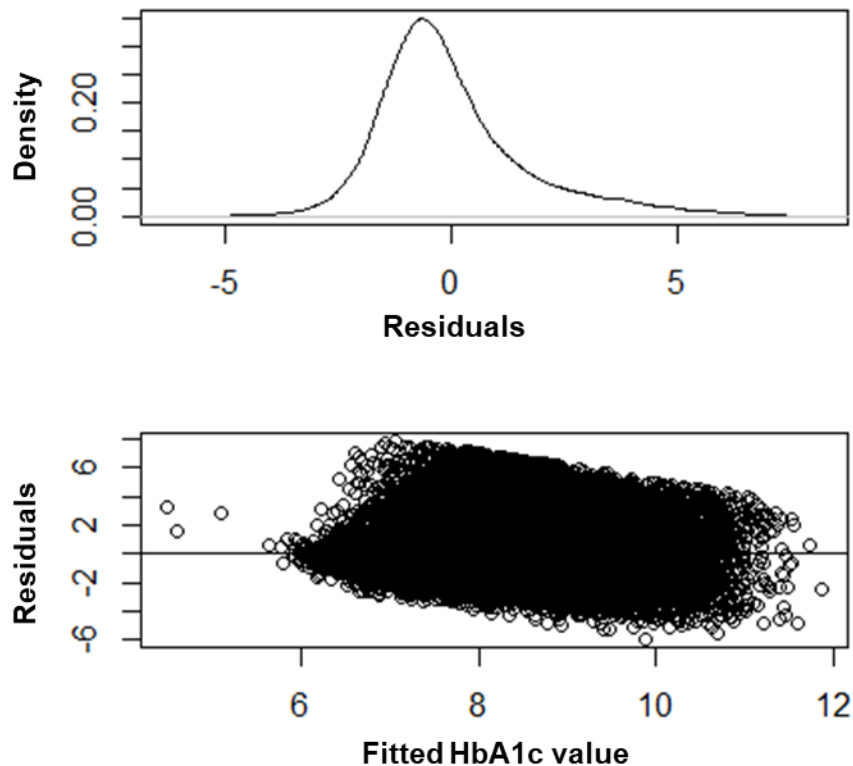

**Supplemental Figure 1.** Analysis of residuals for regression of year of metformin initiation with HbA1c at second-line diabetes treatment initiation. Top shows histogram density plot of residuals, demonstrating approximate normality in distribution of residuals. Bottom shows residuals as a function of fitted HbA1c value, demonstrating relative homogeneity of residuals across the fitted HbA1c distribution.

**Supplemental Figure 2.** Plot of Schoenfeld residuals assessing proportional hazards assumption when assessing association of year of metformin monotherapy initiation with time to second-line diabetes treatment initiation.

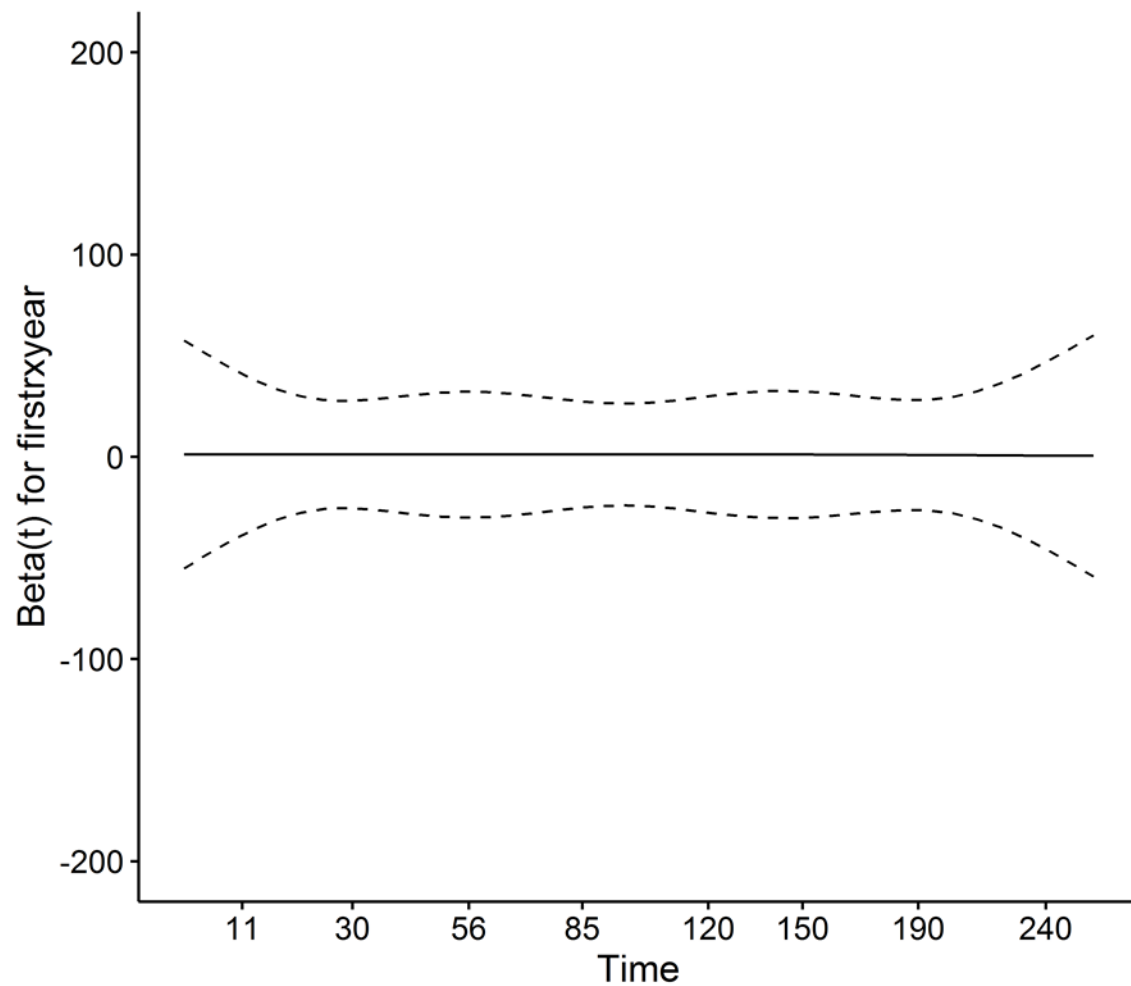

**Supplemental Figure 2.** Plot of Schoenfeld residuals versus time from Cox proportional hazards model evaluating association of year of metformin initiation with time to second-line diabetes treatment initiation. Solid line represents best fit line, and dashed lines represent 2 standard error confidence limits. Individual points not included due to number of observations. Visually, best fit line has slope near 0, but  $P < 0.0001$  for test of independence of residuals with time.

**Supplemental Figure 3. Trends in second-line diabetes medication use among patients receiving initial metformin monotherapy for diabetes from 2005-2013.**

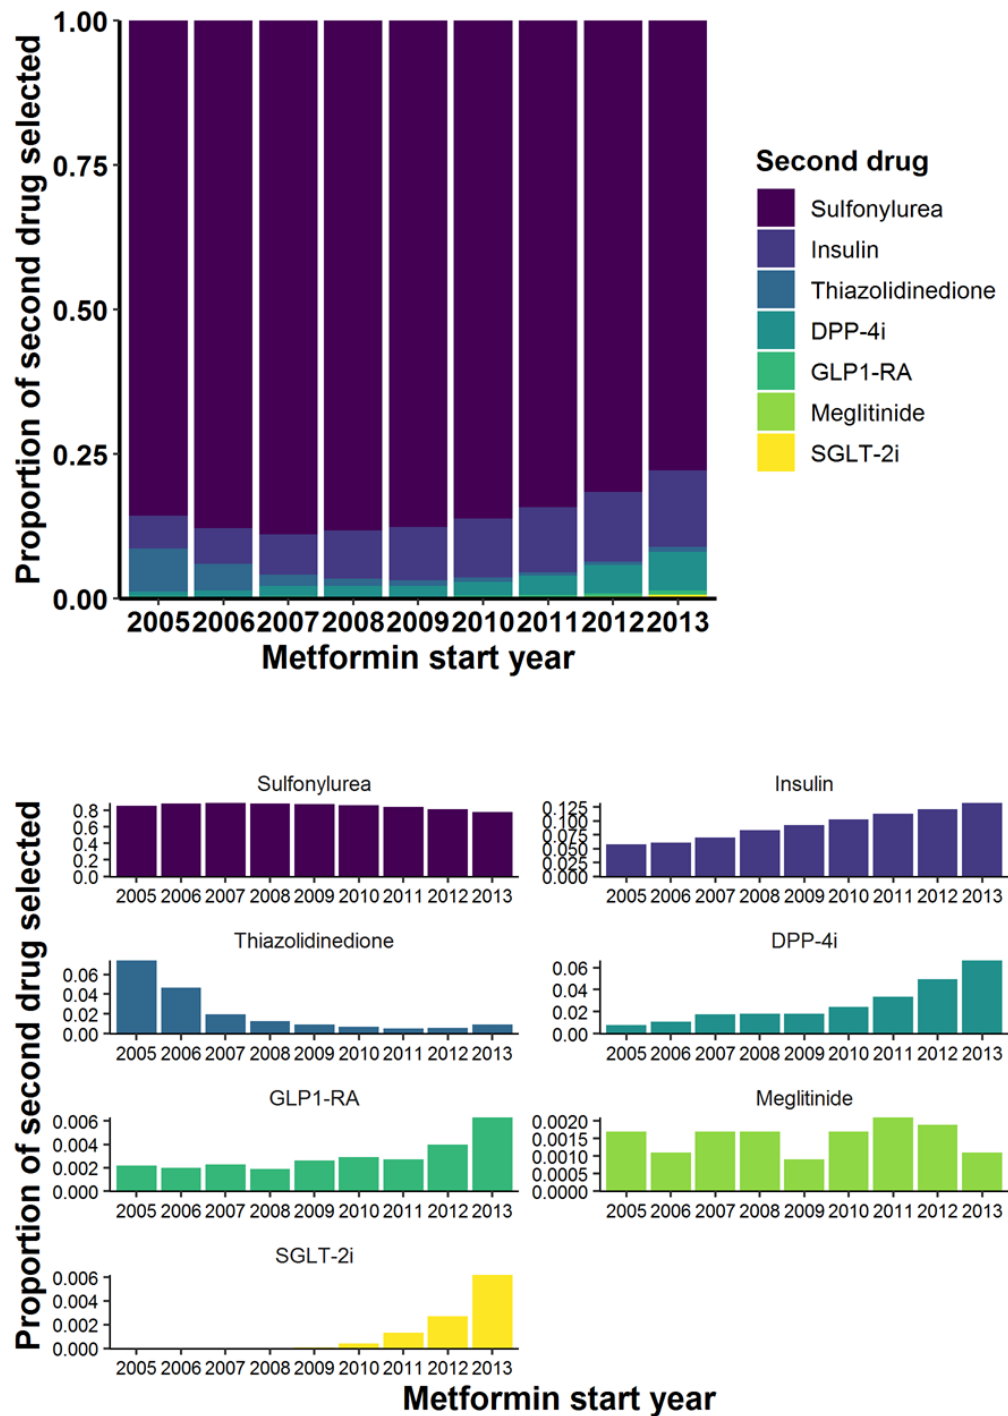

**Supplemental Figure 3.** Proportion of second-line diabetes medications falling within each of seven medication classes based on year of initial metformin prescription for first-line monotherapy. Second-line medication choices are shown stacked adding up to 100% (**top**) and separately by medication class (**bottom**).

**Supplemental Figure 4. Hemoglobin A1c trends at baseline and at initiation of second diabetes medication using narrow baseline definition of occurring between 1 year prior to and 1 month after metformin initiation.**

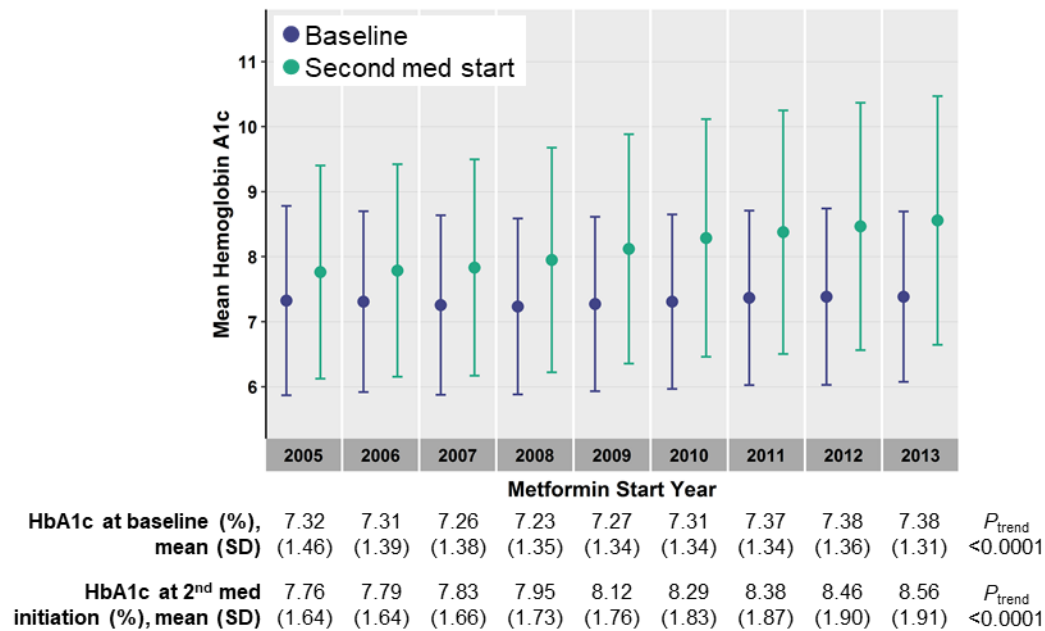

**Supplemental Figure 4.** Trends in hemoglobin A1c at baseline and at time of initiation of second diabetes medication in the full sample; points and vertical bars represent the mean and standard deviation of hemoglobin A1c for each year. The mean and standard deviation (SD) at baseline and at the initiation of second-line diabetes treatment for each group of patients based on year of metformin monotherapy initiation are shown below the plots. Increasing trend over time in mean HbA1c at baseline and at initiation of second-line treatment were both significant with  $P_{\text{trend}} < 0.0001$  for both.

**Supplemental Figure 5. Trends in time to second-line diabetes treatment initiation among patients initially treated with metformin monotherapy from 2005-2013.**

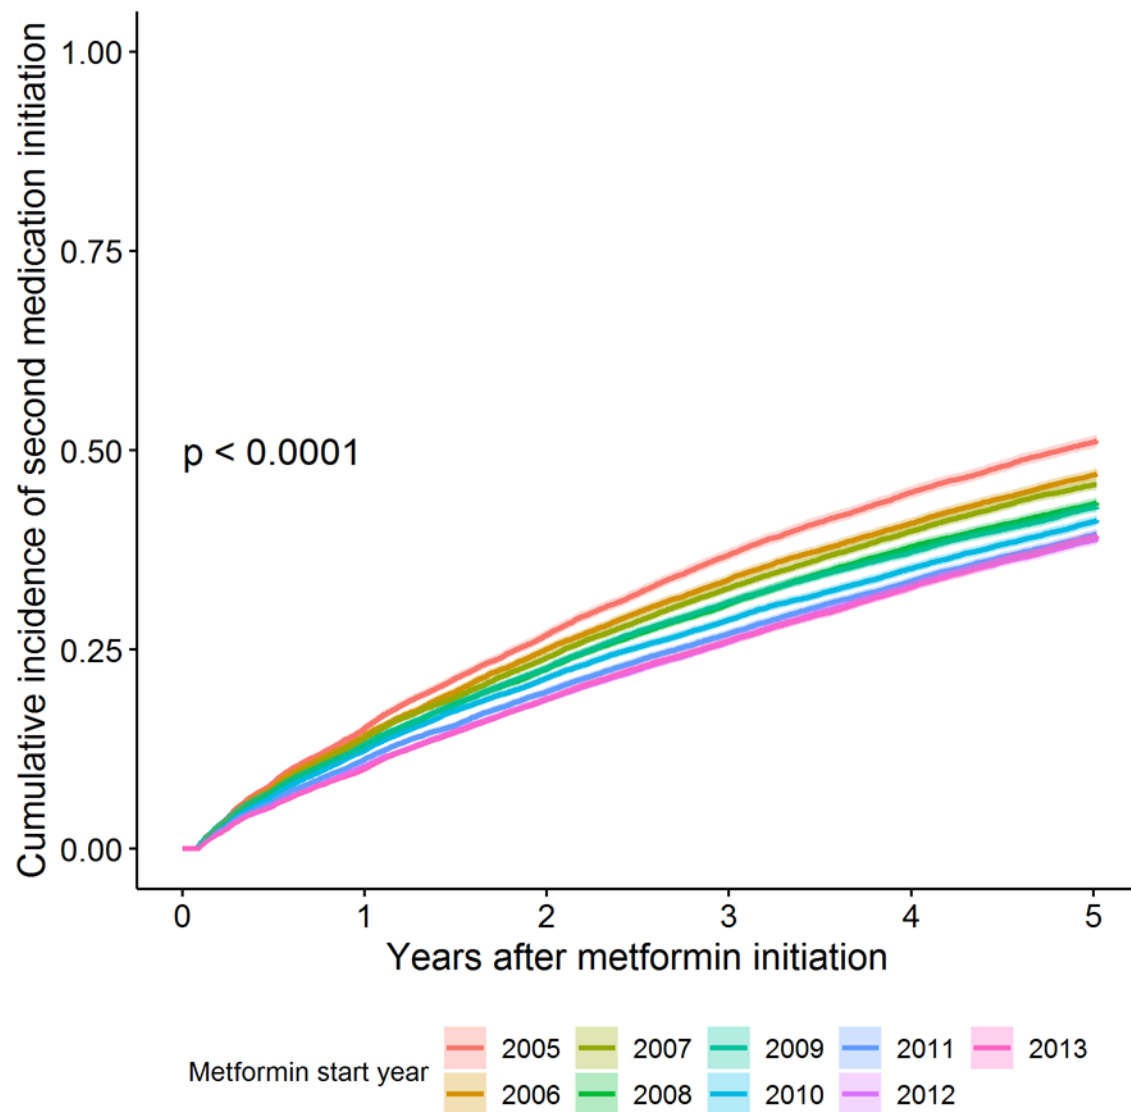

**Supplemental Figure 5.** Cumulative incidence of initiation of second diabetes medication over five years by year of initial metformin monotherapy for diabetes. Log-rank test p-value for differences in cumulative incidence by initial metformin treatment year is shown.

**Supplemental Figure 6. Trends in time to second-line diabetes treatment initiation among patients initially treated with metformin monotherapy from 2005-2013, stratified by baseline age  $\leq 55$  years (A) or  $>55$  years (B).**

**A.**

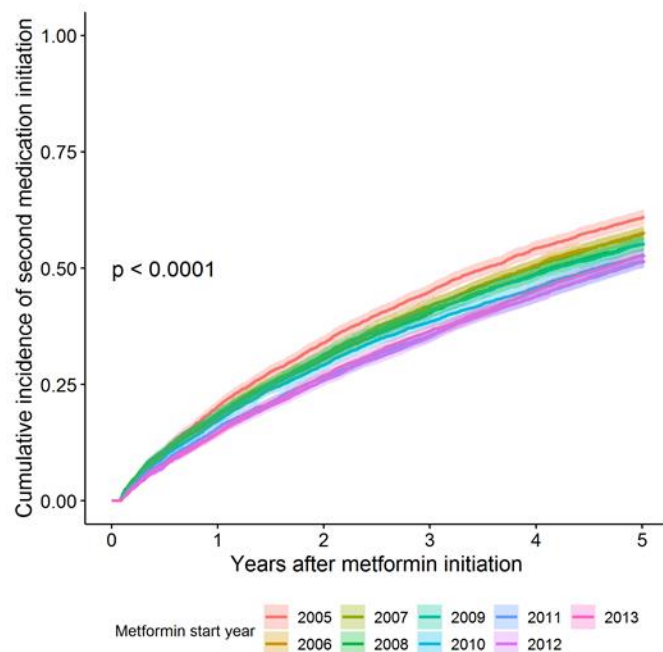

**B.**

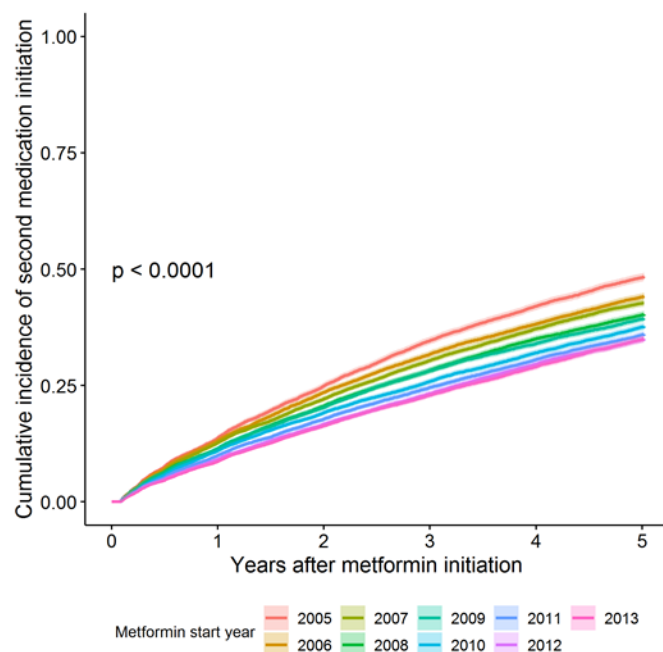

**Supplemental Figure 6.** Cumulative incidence of initiation of second diabetes medication over five years by year of initial metformin monotherapy for diabetes among those  $\leq 55$  years (A) and  $>55$  years (B) of age at the time of initiating metformin. Log-rank test p-value for differences in cumulative incidence by initial metformin treatment year is shown.

**Supplemental Figure 7. Trends in HbA1c surveillance frequency among individuals initially treated with metformin monotherapy for diabetes from 2005-2013.**

**A.**

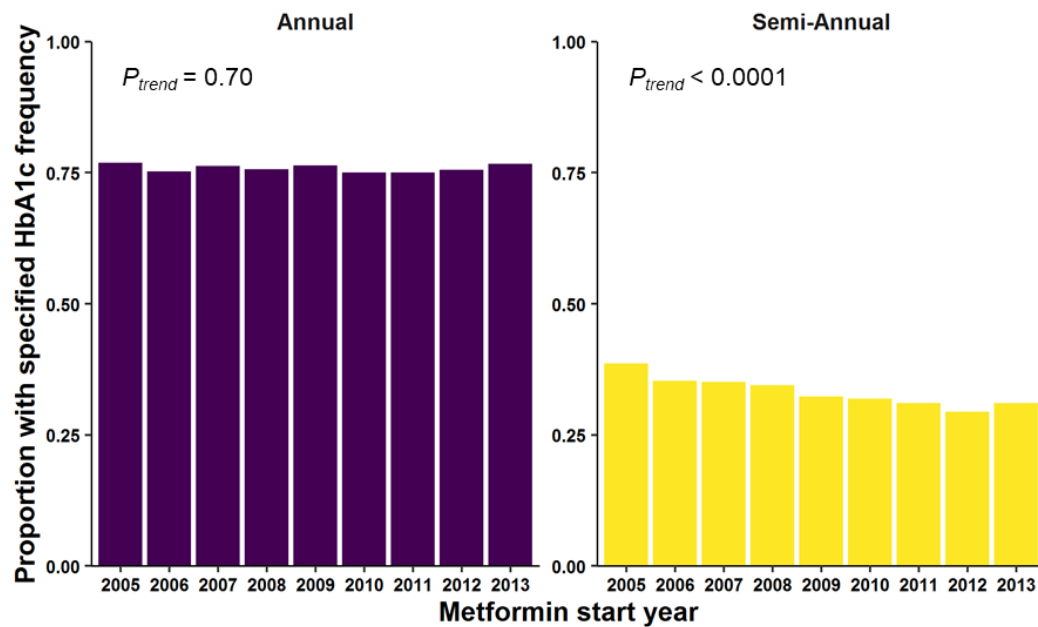

**B.**

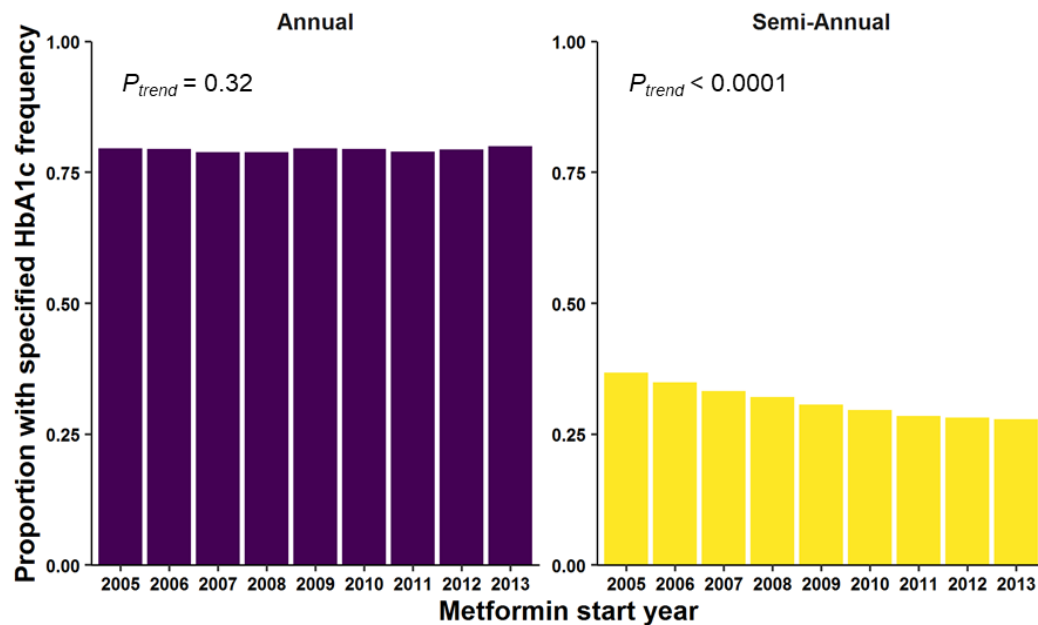

**Supplemental Figure 7.** Proportions of diabetes patients initially treated with metformin with at least one ("Annual") or two ("Semi-Annual") HbA1c measurements per year between metformin initiation and second-line medication initiation or end of follow-up in those ≤55 years (A) and >55 years old at baseline (B).



**STROBE Statement**—checklist of items that should be included in reports of observational studies

|                           | Item No. | Recommendation                                                                                                                                                                             | Page No. |
|---------------------------|----------|--------------------------------------------------------------------------------------------------------------------------------------------------------------------------------------------|----------|
| <b>Title and abstract</b> | 1        | (a) Indicate the study's design with a commonly used term in the title or the abstract                                                                                                     | 2        |
|                           |          | (b) Provide in the abstract an informative and balanced summary of what was done and what was found                                                                                        | 2        |
| <b>Introduction</b>       |          |                                                                                                                                                                                            |          |
| Background/rationale      | 2        | Explain the scientific background and rationale for the investigation being reported                                                                                                       | 4        |
| Objectives                | 3        | State specific objectives, including any prespecified hypotheses                                                                                                                           | 5        |
| <b>Methods</b>            |          |                                                                                                                                                                                            |          |
| Study design              | 4        | Present key elements of study design early in the paper                                                                                                                                    | 5-9      |
| Setting                   | 5        | Describe the setting, locations, and relevant dates, including periods of recruitment, exposure, follow-up, and data collection                                                            | 5-6      |
| Participants              | 6        | (a) <i>Cohort study</i> —Give the eligibility criteria, and the sources and methods of selection of participants. Describe methods of follow-up                                            | 5-6      |
|                           |          | <i>Case-control study</i> —Give the eligibility criteria, and the sources and methods of case ascertainment and control selection. Give the rationale for the choice of cases and controls |          |
|                           |          | <i>Cross-sectional study</i> —Give the eligibility criteria, and the sources and methods of selection of participants                                                                      |          |
|                           |          | (b) <i>Cohort study</i> —For matched studies, give matching criteria and number of exposed and unexposed                                                                                   |          |
|                           |          | <i>Case-control study</i> —For matched studies, give matching criteria and the number of controls per case                                                                                 |          |
| Variables                 | 7        | Clearly define all outcomes, exposures, predictors, potential confounders, and effect modifiers. Give diagnostic criteria, if applicable                                                   | 7        |
| Data sources/measurement  | 8*       | For each variable of interest, give sources of data and details of methods of assessment (measurement). Describe comparability of assessment methods if there is more than one group       | 6-7      |
| Bias                      | 9        | Describe any efforts to address potential sources of bias                                                                                                                                  | 8-9      |
| Study size                | 10       | Explain how the study size was arrived at                                                                                                                                                  | 5-6, 9   |
| Quantitative variables    | 11       | Explain how quantitative variables were handled in the analyses. If applicable, describe which groupings were chosen and why                                                               | 8-9      |

|                     |     |                                                                                                                                                                                                              |                         |
|---------------------|-----|--------------------------------------------------------------------------------------------------------------------------------------------------------------------------------------------------------------|-------------------------|
| Statistical methods | 12  | (a) Describe all statistical methods, including those used to control for confounding                                                                                                                        | 8-9                     |
|                     |     | (b) Describe any methods used to examine subgroups and interactions                                                                                                                                          | 8-9                     |
|                     |     | (c) Explain how missing data were addressed                                                                                                                                                                  | 7                       |
|                     |     | (d) <i>Cohort study</i> —If applicable, explain how loss to follow-up was addressed                                                                                                                          | 8-9                     |
|                     |     | <i>Case-control study</i> —If applicable, explain how matching of cases and controls was addressed                                                                                                           |                         |
|                     |     | <i>Cross-sectional study</i> —If applicable, describe analytical methods taking account of sampling strategy                                                                                                 |                         |
|                     |     | (e) Describe any sensitivity analyses                                                                                                                                                                        | 8-9                     |
| Participants        | 13* | (a) Report numbers of individuals at each stage of study—eg numbers potentially eligible, examined for eligibility, confirmed eligible, included in the study, completing follow-up, and analysed            | 9                       |
|                     |     | (b) Give reasons for non-participation at each stage                                                                                                                                                         | -                       |
|                     |     | (c) Consider use of a flow diagram                                                                                                                                                                           | -                       |
| Descriptive data    | 14* | (a) Give characteristics of study participants (eg demographic, clinical, social) and information on exposures and potential confounders                                                                     | Table 1, Supp Table 2-5 |
|                     |     | (b) Indicate number of participants with missing data for each variable of interest                                                                                                                          | Supp Table 3            |
|                     |     | (c) <i>Cohort study</i> —Summarise follow-up time (eg, average and total amount)                                                                                                                             | Table 1, Supp Table 5   |
| Outcome data        | 15* | <i>Cohort study</i> —Report numbers of outcome events or summary measures over time                                                                                                                          | 10-12                   |
|                     |     | <i>Case-control study</i> —Report numbers in each exposure category, or summary measures of exposure                                                                                                         |                         |
|                     |     | <i>Cross-sectional study</i> —Report numbers of outcome events or summary measures                                                                                                                           |                         |
| Main results        | 16  | (a) Give unadjusted estimates and, if applicable, confounder-adjusted estimates and their precision (eg, 95% confidence interval). Make clear which confounders were adjusted for and why they were included | Table 2, Figure 1-2     |
|                     |     | (b) Report category boundaries when continuous variables were categorized                                                                                                                                    | NA                      |
|                     |     | (c) If relevant, consider translating estimates of relative risk into absolute risk for a meaningful time period                                                                                             | Table 2                 |

|                          |    |                                                                                                                                                                            |                    |
|--------------------------|----|----------------------------------------------------------------------------------------------------------------------------------------------------------------------------|--------------------|
| Other analyses           | 17 | Report other analyses done—eg analyses of subgroups and interactions, and sensitivity analyses                                                                             | 10-13, Online Supp |
| <b>Discussion</b>        |    |                                                                                                                                                                            |                    |
| Key results              | 18 | Summarise key results with reference to study objectives                                                                                                                   | 13-14              |
| Limitations              | 19 | Discuss limitations of the study, taking into account sources of potential bias or imprecision. Discuss both direction and magnitude of any potential bias                 | 16-18              |
| Interpretation           | 20 | Give a cautious overall interpretation of results considering objectives, limitations, multiplicity of analyses, results from similar studies, and other relevant evidence | 18                 |
| Generalisability         | 21 | Discuss the generalisability (external validity) of the study results                                                                                                      | 17                 |
| <b>Other information</b> |    |                                                                                                                                                                            |                    |
| Funding                  | 22 | Give the source of funding and the role of the funders for the present study and, if applicable, for the original study on which the present article is based              | 18-19              |

\*Give information separately for cases and controls in case-control studies and, if applicable, for exposed and unexposed groups in cohort and cross-sectional studies.
